# Supplementary material for: A Dirac nodal surface semi-metallic carbon-based structure as a universal anode material for metal-ion batteries with high performance
Source: Royal Society of Chemistry journal article supplement (doi:10.1039/d1cp02306c), 2021-01-01
Supplement: d1cp02306c1.pdf [file d1cp02306c1.pdf]

Supporting Information of

**Dirac nodal surface semimetallic carbon based structure as  
a universal anode material for metal-ion batteries with high  
performance**

Shouren Zhang, Huili Liu, Yadan Zhang, Shuaiwei Wang\*, Baocheng Yang\*

*Henan Key Laboratory of Nanocomposites and Applications, Institute of Nanostructured Functional  
Materials, Huanghe Science and Technology College, Zhengzhou 450006, China*

---

\* To whom correspondence should be addressed.  
Email: shuaiweiwang@hotmail.com or baochengyang@infm.hhstu.edu.cn

Figure S1. (a) The total potential energies at the temperature of 300 and 2000 K during 10 ps. (b) The snapshot of 300 K for bct-C56 at the end of 10 ps. (c) The snapshot of 2000 K for bct-C56 at the end of 10 ps.

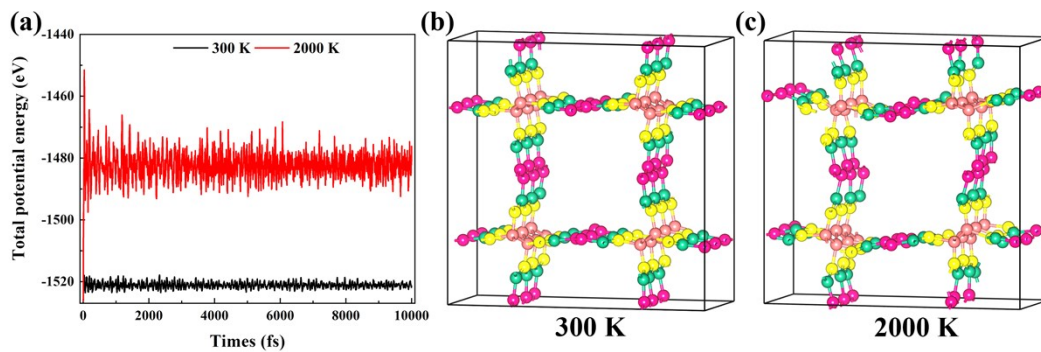

Figure S2. The band structures of bct-C56 at the high symmetry points along the line X-Z<sub>1</sub>, X-N, M-P, and  $\Gamma$ -N.

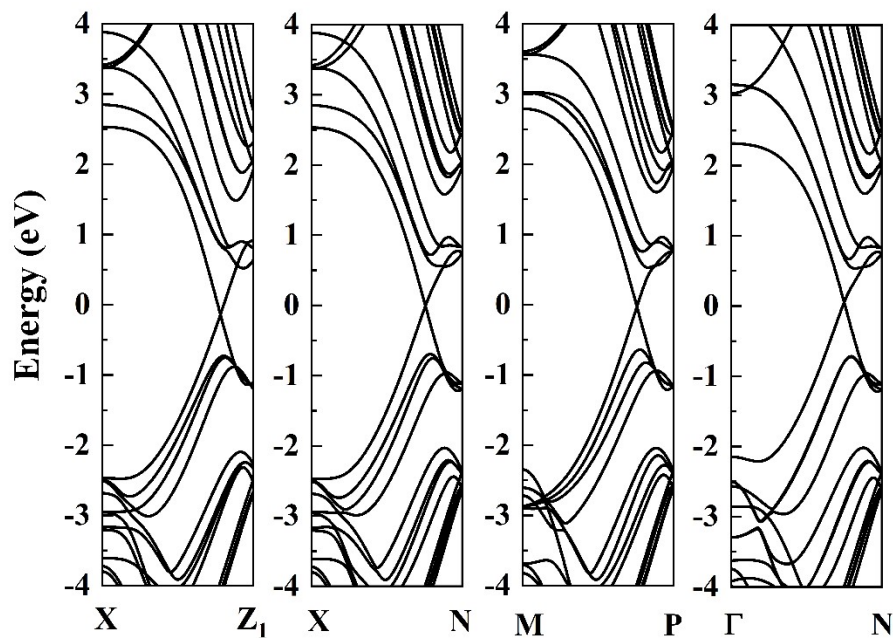

Figure S3. The 3D band structure of bct-C56 along the X-P-N-N<sub>1</sub> plane.

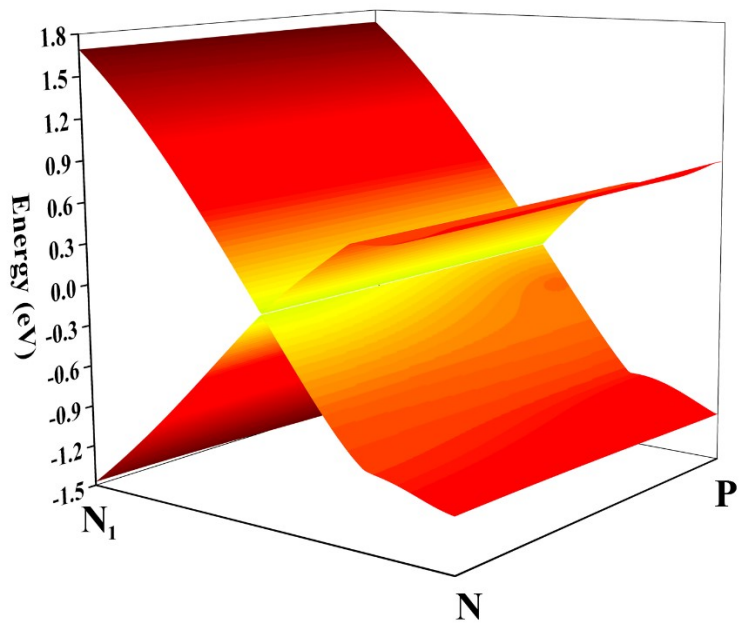

Figure S4. The band structure of bct-C56 by considering SOC effect.

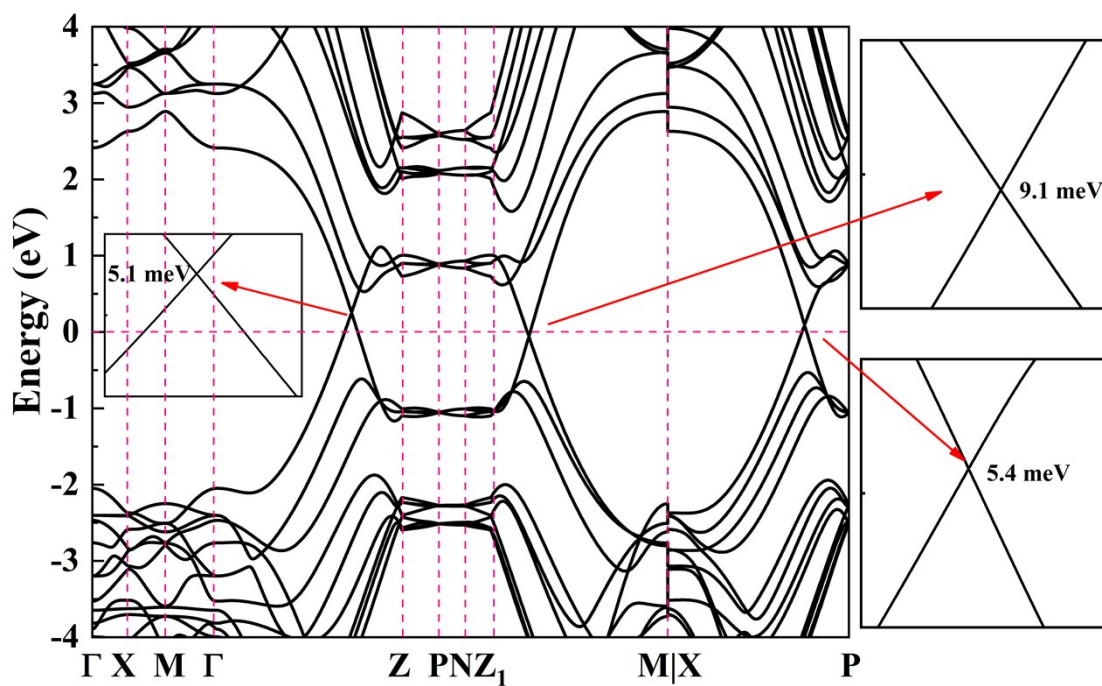

Figure S5. The most stable structures at different concentration (a-d) Li-, (e-i) Na-, and (j-o) K-ions in 3D porous bct-C56.

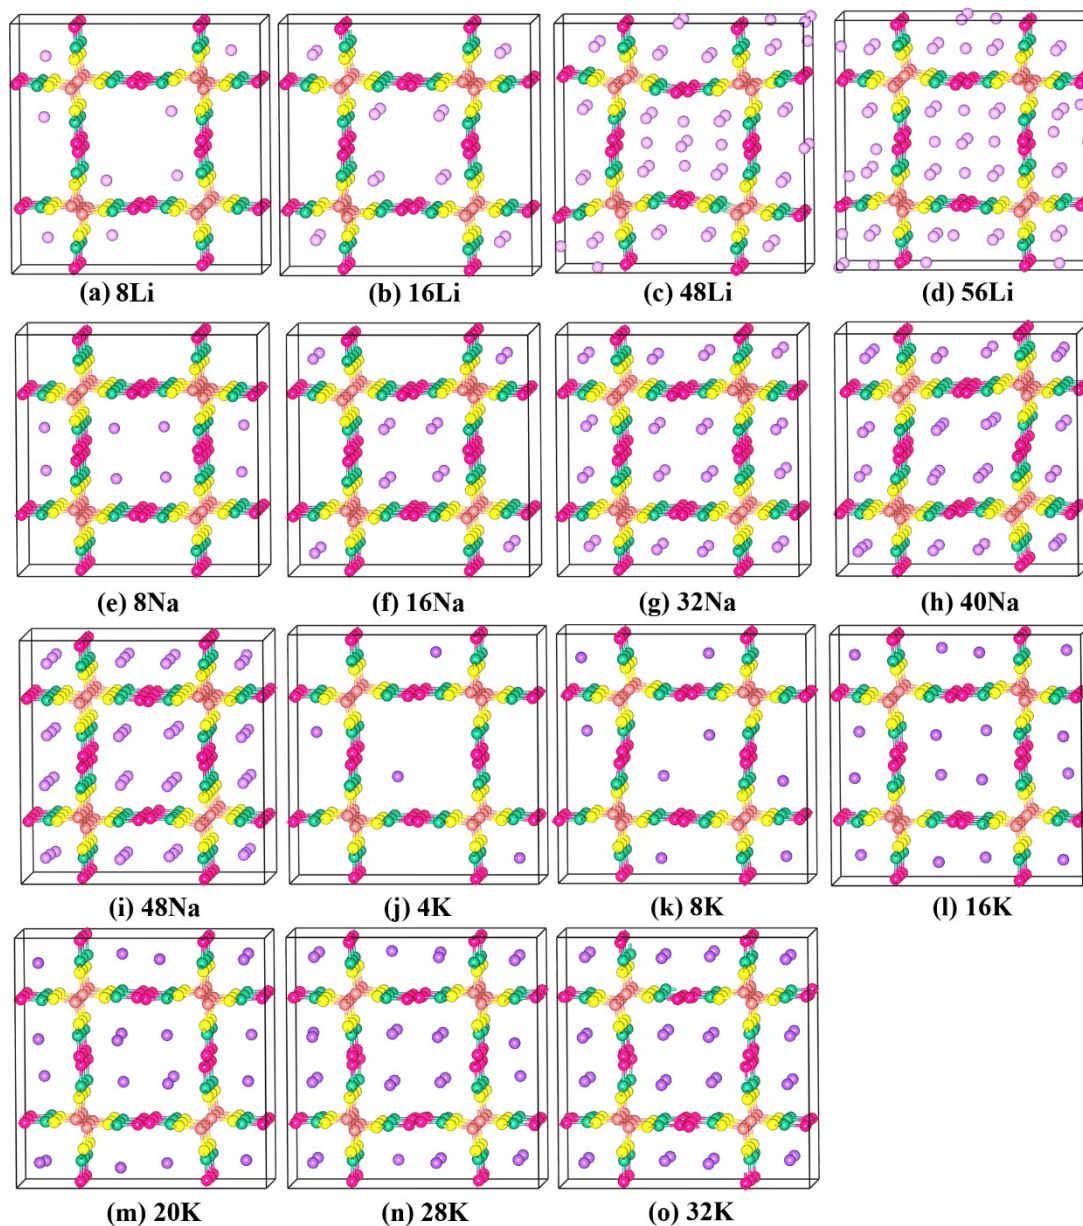

The cif file of bct-c56 in vasp format.

Bct-c56

1.0000000000000000

17.2424489297253452 0.0000000000000000 0.0000000000000000

-0.0000000000000000 17.2424489297253452 -0.0000000000000000

0.0000000000000000 0.0000000000000000 2.4672389730169195

C

56

Direct

0.2564389031128460 0.9795244009786973 0.0000000000000000

0.7435610668871516 0.0204755990213025 -0.0000000000000000

0.0204755990213025 0.2564389031128460 -0.0000000000000000

|                    |                    |                     |
|--------------------|--------------------|---------------------|
| 0.9795244009786973 | 0.7435610668871516 | 0.0000000000000000  |
| 0.7435610668871516 | 0.9795244009786973 | 0.5000000000000000  |
| 0.2564389031128460 | 0.0204755990213025 | 0.5000000000000000  |
| 0.9795244009786973 | 0.2564389031128460 | 0.5000000000000000  |
| 0.0204755990213025 | 0.7435610668871516 | 0.5000000000000000  |
| 0.7564389331128484 | 0.4795244009786976 | 0.5000000000000000  |
| 0.2435610968871541 | 0.5204755990213027 | 0.5000000000000000  |
| 0.5204755990213027 | 0.7564389331128484 | 0.5000000000000000  |
| 0.4795244009786976 | 0.2435610968871541 | 0.5000000000000000  |
| 0.2435610968871541 | 0.4795244009786976 | -0.0000000000000000 |
| 0.7564389331128484 | 0.5204755990213027 | 0.0000000000000000  |
| 0.4795244009786976 | 0.7564389331128484 | -0.0000000000000000 |
| 0.5204755990213027 | 0.2435610968871541 | 0.0000000000000000  |
| 0.3556164640975764 | 0.2403522900798103 | 0.0000000000000000  |
| 0.6443835359024238 | 0.7596477099201898 | -0.0000000000000000 |
| 0.7596477099201898 | 0.3556164640975764 | 0.0000000000000000  |
| 0.2403522900798103 | 0.6443835359024238 | -0.0000000000000000 |
| 0.6443835359024238 | 0.2403522900798103 | 0.5000000000000000  |
| 0.3556164640975764 | 0.7596477099201898 | 0.5000000000000000  |
| 0.2403522900798103 | 0.3556164640975764 | 0.5000000000000000  |
| 0.7596477099201898 | 0.6443835359024238 | 0.5000000000000000  |
| 0.8556164640975762 | 0.7403522900798102 | 0.5000000000000000  |
| 0.1443835359024238 | 0.2596477099201897 | 0.5000000000000000  |
| 0.2596477099201897 | 0.8556164640975762 | 0.5000000000000000  |
| 0.7403522900798102 | 0.1443835359024238 | 0.5000000000000000  |
| 0.1443835359024238 | 0.7403522900798102 | 0.0000000000000000  |
| 0.8556164640975762 | 0.2596477099201897 | -0.0000000000000000 |
| 0.7403522900798102 | 0.8556164640975762 | -0.0000000000000000 |
| 0.2596477099201897 | 0.1443835359024238 | 0.0000000000000000  |
| 0.2581387658167173 | 0.1039206394157938 | 0.5000000000000000  |
| 0.7418612341832824 | 0.8960793605842065 | 0.5000000000000000  |
| 0.8960793605842065 | 0.2581387658167173 | 0.5000000000000000  |
| 0.1039206394157938 | 0.7418612341832824 | 0.5000000000000000  |
| 0.7418612341832824 | 0.1039206394157938 | -0.0000000000000000 |
| 0.2581387658167173 | 0.8960793605842065 | 0.0000000000000000  |
| 0.1039206394157938 | 0.2581387658167173 | -0.0000000000000000 |
| 0.8960793605842065 | 0.7418612341832824 | 0.0000000000000000  |
| 0.7581387658167176 | 0.6039206394157935 | 0.0000000000000000  |
| 0.2418612341832825 | 0.3960793605842062 | -0.0000000000000000 |
| 0.3960793605842062 | 0.7581387658167176 | -0.0000000000000000 |
| 0.6039206394157935 | 0.2418612341832825 | 0.0000000000000000  |
| 0.2418612341832825 | 0.6039206394157935 | 0.5000000000000000  |
| 0.7581387658167176 | 0.3960793605842062 | 0.5000000000000000  |
| 0.6039206394157935 | 0.7581387658167176 | 0.5000000000000000  |

|                    |                    |                     |
|--------------------|--------------------|---------------------|
| 0.3960793605842062 | 0.2418612341832825 | 0.5000000000000000  |
| 0.7683162725168583 | 0.2683163315168525 | -0.0000000000000000 |
| 0.2316837274831417 | 0.7316836684831475 | 0.0000000000000000  |
| 0.7316836684831475 | 0.7683162725168583 | 0.0000000000000000  |
| 0.2683163315168525 | 0.2316837274831417 | -0.0000000000000000 |
| 0.2316837274831417 | 0.2683163315168525 | 0.5000000000000000  |
| 0.7683162725168583 | 0.7316836684831475 | 0.5000000000000000  |
| 0.2683163315168525 | 0.7683162725168583 | 0.5000000000000000  |
| 0.7316836684831475 | 0.2316837274831417 | 0.5000000000000000  |
